# Supplementary material for: Air pollution slows down surface warming over the Tibetan Plateau
Source: Copernicus journal article supplement (doi:10.5194/acp-2019-553), 2019-09-10
Supplement: Supplementary file 1 [file acp-2019-553-supplement.pdf]

**Supplement of “Air pollution slows down surface warming over the Tibetan Plateau”**

Aolin Jia<sup>1</sup>, Shunlin Liang<sup>1</sup>, Dongdong Wang<sup>1</sup>, Bo Jiang<sup>2</sup>, Xiaotong Zhang<sup>2</sup>

<sup>1</sup> Department of Geographical Sciences, University of Maryland, College Park, MD, 20742, USA

<sup>2</sup> State Key Laboratory of Remote Sensing Science, Faculty of Geographical Science, Beijing Normal University, Beijing, China

## S1. Data

### S1.1 Surface air temperature datasets

**Table S1 (Rao *et al.*, 2018). Meta information on the four surface air temperature datasets. All datasets were resampled into 1 Lat/Lon degree, and the climatology periods were transferred to 1961–1990 in the paper. All data were accessed on 20 July 2018.**

| Data      | Spatial Resolution | Climatology Period | No. of Sites | Homogenization method                                                                                       | Interpolation method                                                                       | Data Availability                                                                       | Notes                                          |
|-----------|--------------------|--------------------|--------------|-------------------------------------------------------------------------------------------------------------|--------------------------------------------------------------------------------------------|-----------------------------------------------------------------------------------------|------------------------------------------------|
| BEST-LAND | 1°×1°              | 1951–1980          | 36866        | scalpel: Split time series using detected break points and automatically adjust weight for each time series | Gaussian process regression/ Kriging                                                       | <a href="http://berkeleyearth.org/data/">http://berkeleyearth.org/data/</a>             | Muller et al. (2013a) and Rohde et al. (2013b) |
| CRU-TEM4v | 5°×5°              | 1961–1990          | 5583         | Comparing with neighbor stations                                                                            | No interpolation implemented                                                               | <a href="http://www.cru.uea.ac.uk/data">http://www.cru.uea.ac.uk/data</a>               | Jones et al. (2012)                            |
| NASA-GISS | 2°×2°              | 1951–1980          | 7290         | Comparing with neighbor stations; urbanization adjustment                                                   | Distance-dependent weighted average of station observations within a 1200-km radius        | <a href="https://data.giss.nasa.gov/gistemp/">https://data.giss.nasa.gov/gistemp/</a>   | Hansen et al. (2010)                           |
| NOAA-NCEI | 5°×5°              | 1961–1990          | 7280         | Comparing with neighbor stations                                                                            | Two-step (low and high frequency) reconstruction using Empirical Orthogonal Teleconnection | <a href="https://governmentshutdown.noaa.gov/">https://governmentshutdown.noaa.gov/</a> | Smith et al. (2008) and Vose et al. (2012)     |

## S2. Supplementary Results

### S2.1 Analysis of Long-Term Surface Downward Solar Radiation Measurements since 1960

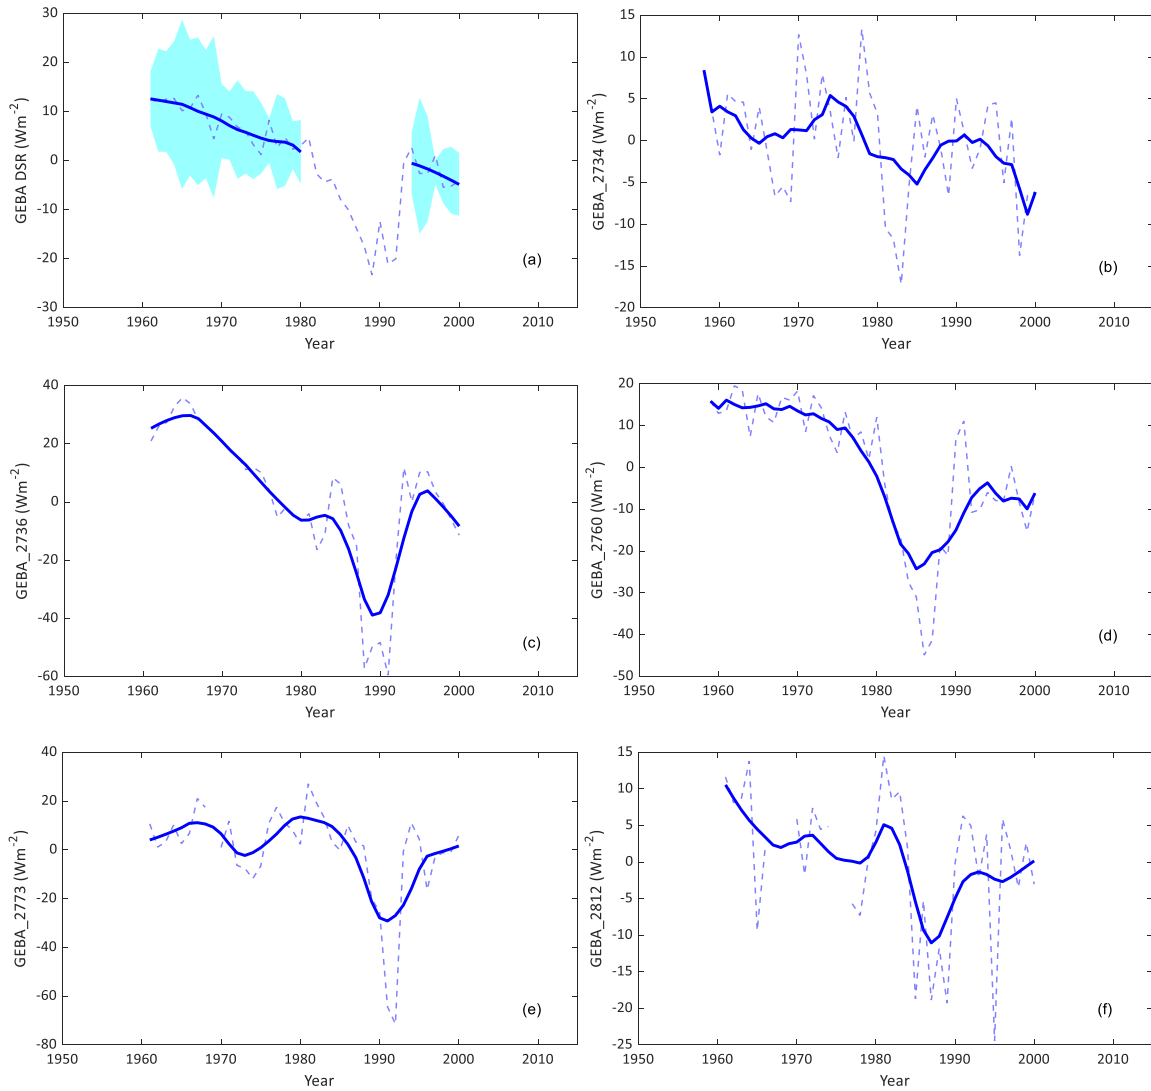

**Fig. S1: Surface DSR temporal variation of (a) 5 GEBA sites mean, (b-f) individual sites. Temporal variations were averaged by the 10-year moving window in order to remove the impact of annual variability. Influences of large volcano eruptions in 1980s and early 1990s were ignored while calculating the average variation.**

## S2.2 Analysis of Deep Convective Clouds and Atmospheric Water Vapor

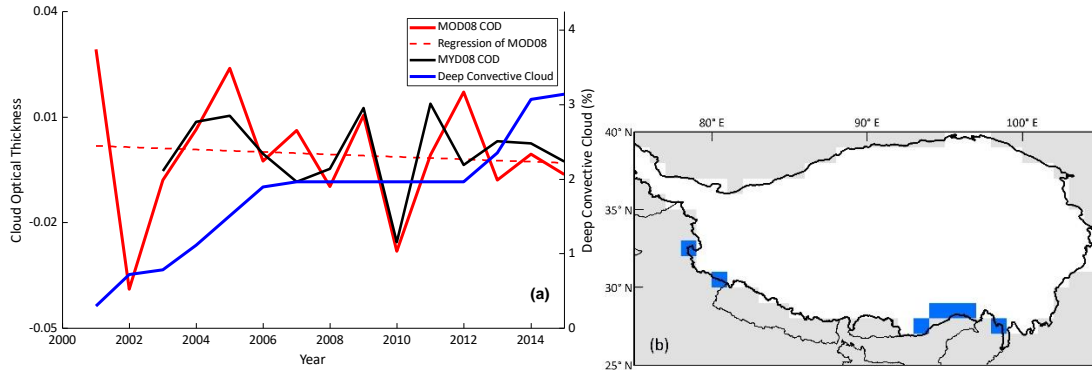

**Fig. S2: (a) Temporal variation of the cloud optical depth and deep convective clouds from the MODIS 08 products; (b) Deep convective cloud distribution over the TP. The blue pixels are the location of the deep convective cloud once it appeared.**

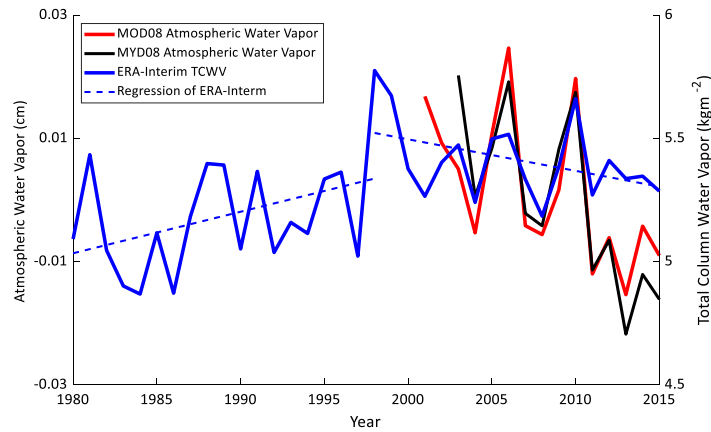

**Fig. S3: Temporal variation of the atmospheric water vapor.**

## S2.3 Aerosol data analysis

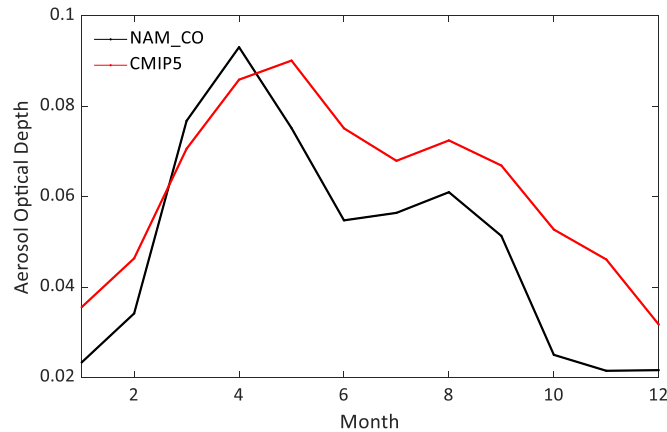

**Figure S4: Monthly climatology of aerosol optical depth from the CMIP5 estimation and AERONET (Aerosol Robotic Network) NAM\_CO site observation.**

## S2.4 Radiative Forcing of Anthropogenic Aerosols

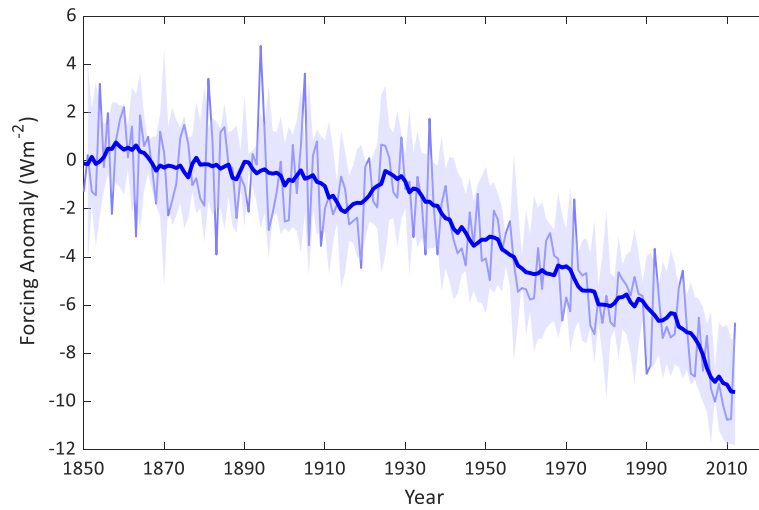

Fig. S5: Temporal variation in the aerosol radiative forcing anomalies.

## S2.5 Depressing Effect Calculated by Two Methods

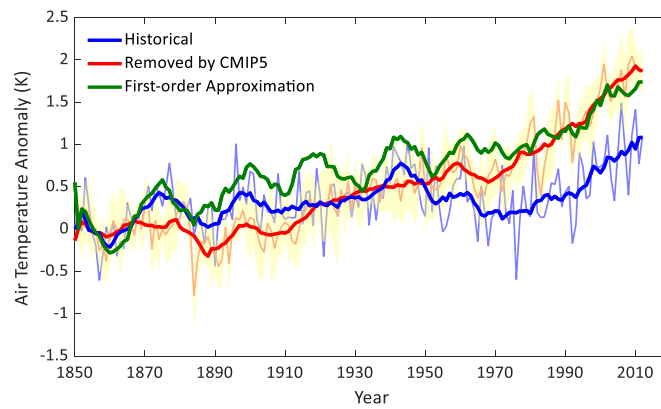

Fig. S6: The temporal annual variation in air temperature, and air temperature with the depressing effect of aerosols removed in the summer season, using two methods.

## References

- Hansen, J., R. Ruedy, M. Sato, and K. Lo (2010), Global surface temperature change, *Reviews of Geophysics*, 48(4).
- Jones, P., D. Lister, T. Osborn, C. Harpham, M. Salmon, and C. Morice (2012), Hemispheric and large - scale land - surface air temperature variations: An extensive revision and an update to 2010, *Journal of Geophysical Research: Atmospheres*, 117(D5).
- Rao, Y., S. Liang, and Y. Yu (2018), Land Surface Air Temperature Data Are Considerably Different Among BEST-LAND, CRU-TEM4v, NASA-GISS, and NOAA-NCEI, *Journal of Geophysical Research: Atmospheres*, 123(11), 5881-5900, doi: 10.1029/2018jd028355.
- Rohde, R., R. Muller, R. Jacobsen, E. Muller, S. Perlmutter, A. Rosenfeld, J. Wurtele, D. Groom, and C. Wickham (2013a), A new estimate of the average Earth surface land temperature spanning 1753 to 2011. *Geoinfor Geostat Overview 1: 1, of, 7, 2*.
- Rohde, R., R. Muller, R. Jacobsen, S. Perlmutter, A. Rosenfeld, J. Wurtele, J. Curry, C. Wickhams, and S. Mosher (2013b), Berkeley Earth Temperature Averaging Process. *Geoinfor Geostat: An Overview 1: 2, of, 13, 20-100*.
- Smith, T. M., R. W. Reynolds, T. C. Peterson, and J. Lawrimore (2008), Improvements to NOAA's historical merged land-ocean surface temperature analysis (1880-2006), *Journal of Climate*, 21(10), 2283-2296.
- Vose, R. S., D. Arndt, V. F. Banzon, D. R. Easterling, B. Gleason, B. Huang, E. Kearns, J. H. Lawrimore, M. J. Menne, and T. C. Peterson (2012), NOAA's merged land-ocean surface temperature analysis, *Bulletin of the American Meteorological Society*, 93(11), 1677-1685.
